# Supplementary material
Source: PubMed Central journal article supplement (PMC8047773)
Supplement: jamapsychiatry-e210154-s001.pdf [file jamapsychiatry-e210154-s001.pdf]

## Supplementary Online Content

Davis MA, Cher BAY, Friese CR, Bynum JPW. Association of US nurse and physician occupation with risk of suicide. *JAMA Psychiatry*. Published online April 14, 2021. doi:10.1001/jamapsychiatry.2021.0154

**eFigure 1.** Flow Diagram for the Identification of Nurse and Physician Suicides in the National Violent Death Reporting System Database

**eTable 1.** De-identified Terms From Free Text Used to Identify Nurse Suicides in the National Violent Death Reporting System Database

**eTable 2.** De-identified Terms From Free Text Used to Identify Physician Suicides in the National Violent Death Reporting System Database

**eTable 3.** States With Complete Data on Suicides Included in the National Violent Death Reporting System Database From 2007 to 2018

**eTable 4.** Unadjusted Trends in Suicide Incidence, Attributable Risk, and Relative Risk Among Nurses, Physicians, and the General Adult Population From 2007-08 to 2017-18

**eFigure 2.** Unadjusted Trends in Suicide Incidence Among Nurses, Physicians, and the General Adult Population for Women (A) and Men (B) Restricted to States That Participated in the National Violent Death Reporting System Database Throughout 2007 to 2018

**eFigure 3.** Age Distribution of US Nurses, Age Distribution of General Population, and Suicide Incidence in the General Population

This supplementary material has been provided by the authors to give readers additional information about their work.

**eFigure 1.** Flow Diagram for the Identification of Nurse and Physician Suicides in the National Violent Death Reporting System Database

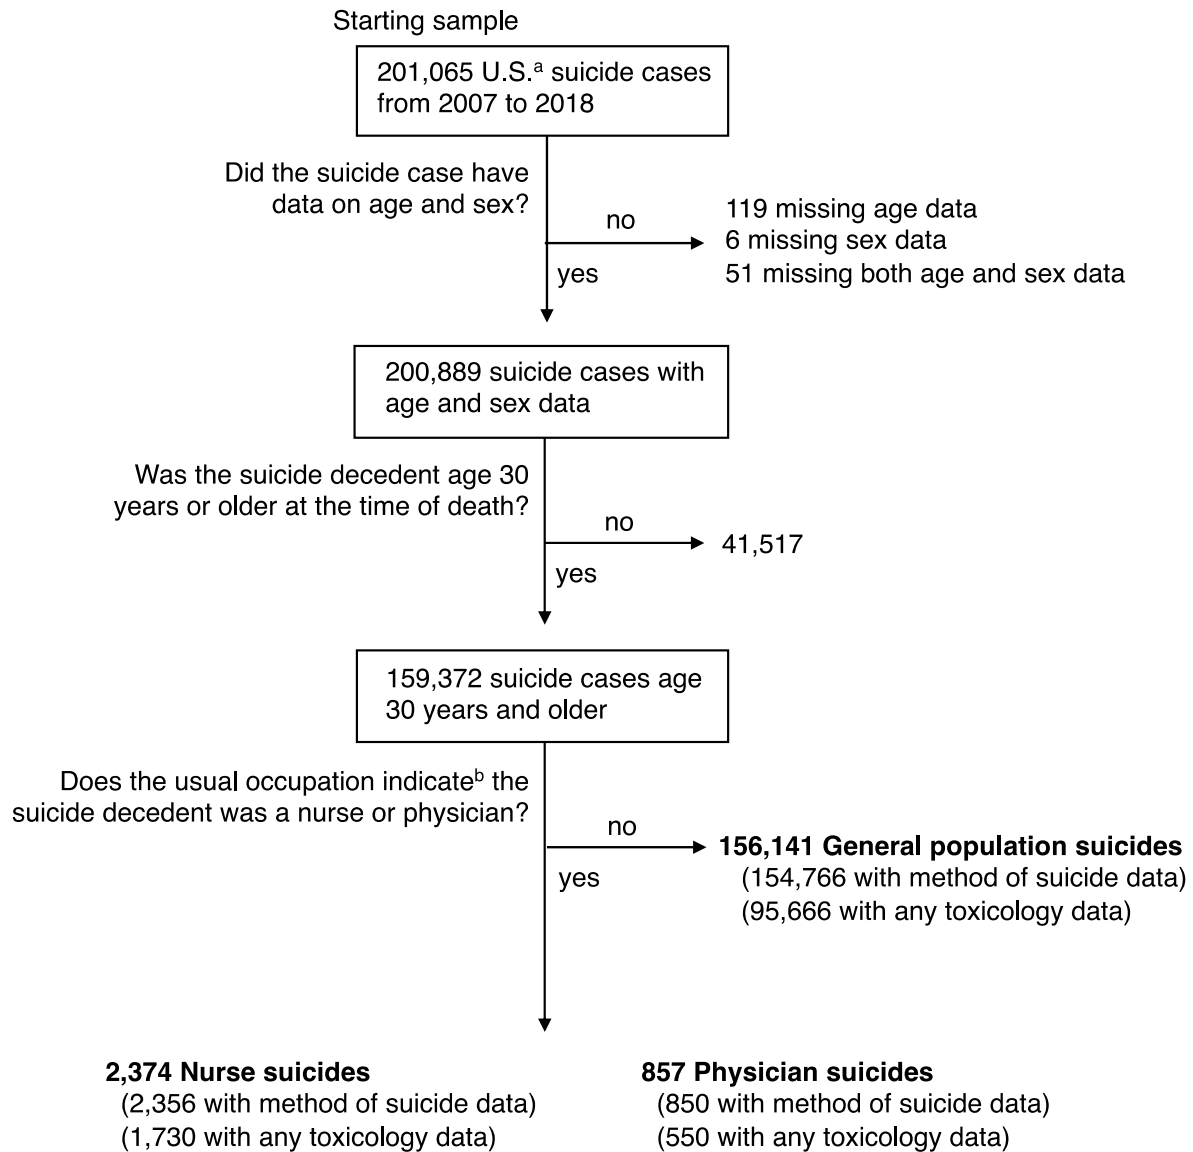

a: Excludes U.S. territories

b: Based on manual review of free text descriptions (Cohen's Kappa statistic for inter-rater reliability 0.97 and 0.91 for nurse and physician suicides respectively) and occupational codes reported in National Violent Death Reporting System Database

**eTable 1.** De-identified Terms From Free Text Used to Identify Nurse Suicides in the National Violent Death Reporting System Database

|                                         |                                       |
|-----------------------------------------|---------------------------------------|
| Administration / Nurse                  | Nursing Medical                       |
| Anesthetist                             | Nursing Professor                     |
| Certified Hospice Nurse                 | Nursing Supervisor                    |
| Certified Nurse Midwife                 | OCN Nurse                             |
| Certified Registered Nurse              | Operating Room Nurse                  |
| Certified Registered Nurse Anesthetist  | Orthopedic Nurse                      |
| Certified Registered Nurse Anesthetists | PCT Nurse                             |
| Certified Registered Nurse Practitioner | Pediatric Nurse                       |
| Charge Nurse                            | Pediatric Nurse / Registered Nurse    |
| Chief Nursing Officer                   | Pediatric Nurse Practitioner          |
| Clinical Nurse                          | Pediatric Triage Nurse                |
| Clinical Nurse Specialist               | Professional Nurse                    |
| Critical Care Nurse                     | Professor of Nursing                  |
| CRNA                                    | Psychiatric Nurse                     |
| Dialysis Nurse                          | RN                                    |
| Director of Nursing                     | Registered Critical Care Nurse        |
| Disabled Nurse                          | Registered Nurse                      |
| Emergency Room Nurse                    | Registered Nurse, Oncology            |
| ER Nurse                                | Registered Nurse, NICU                |
| ER Trauma Nurse                         | Registered Nurse/Educator             |
| Family Nurse Practitioner               | Registered Nurse/Retail               |
| Flight Crew Nurse                       | Registered Nurse                      |
| FNP                                     | Retired Nurse                         |
| Health Nurse                            | Retired Registered Nurse              |
| Heath Care Nurse                        | RN Case Manager                       |
| Home Healthcare Nurse                   | RN, BSN                               |
| Home Health Nurse                       | RN, Director of Nursing               |
| Home Health RR                          | RN, Disabled                          |
| Homemaker, Registered Nurse             | RN, Registered Nurse                  |
| Hospice Nurse                           | School Nurse                          |
| In Home Nurse                           | Senior Investigator or Nurse, Unclear |
| Intensive Care Nurse                    | Surgical Nurse                        |
| Licensed Nurse Practitioner             | Surgical Tech Nurse                   |
| Maternity Nurse                         | Teacher/Psych Nurse                   |
| Mental Health Nurse                     | Teaching Nurse                        |
| Neonatal Nurse                          | Unemployed Nurse                      |
| Neonatal Nurse Practitioner             | Unemployed Rn                         |
| Nurse                                   | Visiting Nurse                        |
| Nurse / Fraud Investigator              |                                       |
| Nurse Administrator                     |                                       |
| Nurse Anesthetist                       |                                       |
| Nurse Practitioner                      |                                       |
| Nurse RN                                |                                       |
| Nurse Supervisor                        |                                       |
| Nurse, Navy                             |                                       |
| Nursing                                 |                                       |
| Nursing Caregiver                       |                                       |
| Nursing Consultant                      |                                       |
| Nursing Coordinator                     |                                       |
| Nursing Director                        |                                       |
| Nursing Home Care                       |                                       |
| Nursing Instructor                      |                                       |
| Nursing Manager                         |                                       |

**eTable 2.** De-identified Terms From Free Text Used to Identify Physician Suicides in the National Violent Death Reporting System Database

|                                 |                              |
|---------------------------------|------------------------------|
| Anesthesiologist                | Otolaryngologist             |
| Assistant Medical Director      | Pain Management Physician    |
| Cardiologist                    | Pathologist                  |
| Cardiovascular Surgeon          | Pediatric Resident Doctor    |
| Chief Medical Examiner          | Pediatric Surgeon            |
| Dermatologist                   | Pediatrician                 |
| Diagnostic Radiologist          | Physician                    |
| Director of Oncology Program    | Physician, Nephrologist      |
| Director of Radiology           | Physician, Pathologist       |
| Division Chief                  | Physicians and Surgeon       |
| Doctor                          | Plastic Surgeon              |
| Doctor Dental Surgery           | Private Practice Pathologist |
| Doctor of Anesthesiology        | Psychiatric Medical Doctor   |
| Doctor of Medicine              | Psychiatrist                 |
| Doctor of Osteopathic Medicine  | Radiologist                  |
| Doctor, Surgical Resident       | Research Physician           |
| Doctor/Psychiatrist             | Resident Physician           |
| Emergency Department Physician  | Retired Anesthesiologist     |
| Emergency Medicine Physician    | Retired Medical Doctor       |
| Emergency Physician             | Retired Surgeon              |
| Emergency Room Physician        | Retired Neurosurgeon         |
| Endocrinologist                 | Retired Pediatrician         |
| ER Physician                    | Retired Physician            |
| Family Medicine Specialist      | Surgeon                      |
| Family Physician                | Unemployed Doctor            |
| Family Practice Physician       | Urologist                    |
| General Physician               | US Army Doctor               |
| General Surgeon                 |                              |
| Gerontologist                   |                              |
| GYN Oncologist                  |                              |
| Hospitalist                     |                              |
| Internal Medicine Physician     |                              |
| Internist                       |                              |
| Internist, Nuclear Cardiologist |                              |
| Interventional Cardiologist     |                              |
| MD                              |                              |
| MD Pathologist                  |                              |
| Medical Director, Self Employed |                              |
| Medical Doctor                  |                              |
| Medical Doctor, Radiologist     |                              |
| Medical Doctor/Surgeon          |                              |
| Medical Examiner                |                              |
| Medical Physician               |                              |
| Medical Resident                |                              |
| Medical Specialist              |                              |
| Neurologist                     |                              |
| Neurosurgeon                    |                              |
| OB-GYN, Doctor                  |                              |
| Oncologist                      |                              |
| Ophthalmologist                 |                              |
| Oral and Maxillofacial Surgery  |                              |
| Orthopedic Doctor               |                              |
| Orthopedic Spine Surgeon        |                              |
| Orthopedic Surgeon              |                              |

**eTable 3. States With Complete Data on Suicides Included in the National Violent Death Reporting System Database From 2007 to 2018**

| State                | 2007 | 2008 | 2009 | 2010 | 2011 | 2012 | 2013 | 2014 | 2015 | 2016 | 2017 | 2018 |
|----------------------|------|------|------|------|------|------|------|------|------|------|------|------|
| Alabama              |      |      |      |      |      |      |      |      |      |      |      | X    |
| Alaska               | X    | X    | X    | X    | X    | X    | X    | X    | X    | X    | X    | X    |
| Arizona              |      |      |      |      |      |      |      |      | X    | X    | X    | X    |
| Colorado             | X    | X    | X    | X    | X    | X    | X    | X    | X    | X    | X    | X    |
| Connecticut          |      |      |      |      |      |      |      |      | X    | X    | X    | X    |
| Delaware             |      |      |      |      |      |      |      |      |      |      | X    | X    |
| District of Columbia |      |      |      |      |      |      |      |      |      |      | X    | X    |
| Georgia              | X    | X    | X    | X    | X    | X    | X    | X    | X    | X    | X    | X    |
| Hawaii               |      |      |      |      |      |      |      |      | X    | X    |      |      |
| Indiana              |      |      |      |      |      |      |      |      |      | X    | X    | X    |
| Iowa                 |      |      |      |      |      |      |      |      |      | X    | X    | X    |
| Kansas               |      |      |      |      |      |      |      |      | X    | X    | X    | X    |
| Kentucky             | X    | X    | X    | X    | X    | X    | X    | X    | X    | X    | X    | X    |
| Louisiana            |      |      |      |      |      |      |      |      |      |      |      | X    |
| Maine                |      |      |      |      |      |      |      |      | X    | X    | X    | X    |
| Maryland             | X    | X    | X    | X    | X    | X    | X    | X    | X    | X    | X    | X    |
| Massachusetts        | X    | X    | X    | X    | X    | X    | X    | X    | X    | X    | X    | X    |
| Michigan             |      |      |      |      |      |      |      | X    | X    | X    | X    | X    |
| Minnesota            |      |      |      |      |      |      |      |      | X    | X    | X    | X    |
| Missouri             |      |      |      |      |      |      |      |      |      |      |      | X    |
| Nebraska             |      |      |      |      |      |      |      |      |      |      |      | X    |
| Nevada               |      |      |      |      |      |      |      |      |      |      | X    | X    |
| New Hampshire        |      |      |      |      |      |      |      |      | X    | X    | X    | X    |
| New Jersey           | X    | X    | X    | X    | X    | X    | X    | X    | X    | X    | X    | X    |
| New Mexico           | X    | X    | X    | X    | X    | X    | X    | X    | X    | X    | X    | X    |
| New York             |      |      |      |      |      |      |      |      | X    | X    | X    | X    |
| North Carolina       | X    | X    | X    | X    | X    | X    | X    | X    | X    | X    | X    | X    |
| Ohio                 |      |      |      |      | X    | X    | X    | X    | X    | X    | X    | X    |
| Oklahoma             | X    | X    | X    | X    | X    | X    | X    | X    | X    | X    | X    | X    |
| Oregon               | X    | X    | X    | X    | X    | X    | X    | X    | X    | X    | X    | X    |
| Puerto Rico          |      |      |      |      |      |      |      |      |      |      | X    | X    |
| Rhode Island         | X    | X    | X    | X    | X    | X    | X    | X    | X    | X    | X    | X    |
| South Carolina       | X    | X    | X    | X    | X    | X    | X    | X    | X    | X    | X    | X    |
| Utah                 | X    | X    | X    | X    | X    | X    | X    | X    | X    | X    | X    | X    |
| Vermont              |      |      |      |      |      |      |      |      | X    | X    | X    | X    |
| Virginia             | X    | X    | X    | X    | X    | X    | X    | X    | X    | X    | X    | X    |
| Washington           |      |      |      |      |      |      |      |      |      |      |      | X    |
| West Virginia        |      |      |      |      |      |      |      |      |      |      | X    | X    |
| Wisconsin            | X    | X    | X    | X    | X    | X    | X    | X    | X    | X    | X    | X    |

**eTable 4.** Unadjusted Trends in Suicide Incidence, Attributable Risk, and Relative Risk Among Nurses, Physicians, and the General Adult Population<sup>a</sup> From 2007-08 to 2017-18

|                                                                                                          | Suicide incidence, No. per 100,000 (95% CI) or Relative Risk (95% CI) |                   |                   |                   |                   |                   |
|----------------------------------------------------------------------------------------------------------|-----------------------------------------------------------------------|-------------------|-------------------|-------------------|-------------------|-------------------|
|                                                                                                          | 2007-08                                                               | 2009-10           | 2011-12           | 2013-14           | 2015-16           | 2017-18           |
| <b>Women</b>                                                                                             |                                                                       |                   |                   |                   |                   |                   |
| Nurses [Incidence <sub>nurse</sub> ]                                                                     | 14.0 (11.9, 16.1)                                                     | 13.7 (11.6, 15.7) | 16.5 (14.5, 18.5) | 18.1 (16.0, 20.2) | 15.2 (13.7, 16.7) | 17.1 (15.6, 18.5) |
| Physicians [Incidence <sub>physician</sub> ]                                                             | 7.2 (2.5, 11.9)                                                       | 7.3 (2.8, 11.7)   | 11.7 (6.6, 16.8)  | 11.2 (6.4, 16.0)  | 6.7 (3.9, 9.5)    | 10.1 (6.9, 13.2)  |
| General Population <sup>a</sup> [Incidence <sub>gen pop</sub> ]                                          | 6.9 (6.7, 7.2)                                                        | 7.1 (6.8, 7.3)    | 7.5 (7.2, 7.7)    | 8.3 (8.1, 8.6)    | 8.1 (7.9, 8.3)    | 8.6 (8.4, 8.7)    |
| <b>Comparative Measures</b>                                                                              |                                                                       |                   |                   |                   |                   |                   |
| Attributable Risk, Nurse occupation [Incidence <sub>nurse</sub> - Incidence <sub>gen pop</sub> ]         | 7.1 (5.0, 9.2)                                                        | 6.6 (4.6, 8.6)    | 9.0 (7.0, 11.0)   | 9.8 (7.7, 11.9)   | 7.1 (5.6, 8.6)    | 8.5 (7.0, 10.0)   |
| Relative Risk, Nurse occupation [Incidence <sub>nurse</sub> / Incidence <sub>gen pop</sub> ]             | 2.02 (1.74, 2.36)                                                     | 1.93 (1.66, 2.25) | 2.21 (1.94, 2.51) | 2.17 (1.93, 2.45) | 1.87 (1.69, 2.07) | 1.99 (1.82, 2.18) |
| Attributable Risk, Physician occupation [Incidence <sub>physician</sub> - Incidence <sub>gen pop</sub> ] | 0.3 (-4.4, 5.0)                                                       | 0.2 (-4.3, 4.7)   | 4.2 (-0.9, 9.4)   | 2.9 (-1.9, 7.7)   | -1.4 (-4.2, 1.4)  | 1.5 (-1.7, 4.7)   |
| Relative Risk, Physician occupation [Incidence <sub>physician</sub> / Incidence <sub>gen pop</sub> ]     | 1.04 (0.54, 2.00)                                                     | 1.03 (0.55, 1.91) | 1.57 (1.01, 2.43) | 1.34 (0.88, 2.07) | 0.82 (0.54, 1.25) | 1.18 (0.86, 1.61) |
| <b>Men</b>                                                                                               |                                                                       |                   |                   |                   |                   |                   |
| Nurses [Incidence <sub>nurse</sub> ]                                                                     | 29.4 (19.4, 39.4)                                                     | 34.9 (24.3, 45.4) | 29.3 (20.8, 37.7) | 38.5 (29.3, 47.6) | 39.9 (32.8, 47.0) | 31.1 (25.6, 36.6) |
| Physicians [Incidence <sub>physician</sub> ]                                                             | 22.9 (17.4, 28.5)                                                     | 26.6 (20.6, 32.5) | 25.7 (20.2, 31.1) | 28.7 (22.9, 34.5) | 30.5 (25.8, 35.1) | 31.5 (26.9, 36.1) |
| General Population <sup>a</sup> [Incidence <sub>gen pop</sub> ]                                          | 26.6 (26.0, 27.1)                                                     | 27.8 (27.3, 28.2) | 28.3 (27.8, 28.7) | 30.8 (30.4, 31.3) | 29.3 (28.9, 29.7) | 32.6 (32.2, 32.9) |
| <b>Comparative Measures</b>                                                                              |                                                                       |                   |                   |                   |                   |                   |
| Attributable Risk, Nurse occupation [Incidence <sub>nurse</sub> - Incidence <sub>gen pop</sub> ]         | 2.7 (-7.3, 12.8)                                                      | 7.1 (-3.5, 17.7)  | 1.0 (-7.5, 9.4)   | 7.6 (-1.5, 16.8)  | 10.6 (3.5, 17.8)  | -1.5 (-7.0, 4.0)  |
| Relative Risk, Nurse occupation [Incidence <sub>nurse</sub> / Incidence <sub>gen pop</sub> ]             | 1.10 (0.78, 1.55)                                                     | 1.26 (0.93, 1.70) | 1.03 (0.77, 1.38) | 1.25 (0.98, 1.58) | 1.36 (1.14, 1.63) | 0.95 (0.80, 1.14) |
| Attributable Risk, Physician occupation [Incidence <sub>physician</sub> - Incidence <sub>gen pop</sub> ] | -3.7 (-9.2, 1.9)                                                      | -1.2 (-7.2, 4.8)  | -2.7 (-8.1, 2.8)  | -2.1 (-7.9, 3.7)  | 1.2 (-3.5, 5.9)   | -1.1 (-5.7, 3.5)  |
| Relative Risk, Physician occupation [Incidence <sub>physician</sub> / Incidence <sub>gen pop</sub> ]     | 0.86 (0.68, 1.10)                                                     | 0.96 (0.76, 1.20) | 0.91 (0.73, 1.12) | 0.93 (0.76, 1.14) | 1.04 (0.89, 1.21) | 0.97 (0.84, 1.12) |
| Abbreviations: CI, confidence interval                                                                   |                                                                       |                   |                   |                   |                   |                   |
| a: General population refers to adults (age ≥ 30 years) who are not nurses nor physicians                |                                                                       |                   |                   |                   |                   |                   |

**eFigure 2.** Unadjusted Trends in Suicide Incidence Among Nurses, Physicians, and the General Adult Population<sup>a</sup> for Women (A) and Men (B) Restricted to States That Participated in the National Violent Death Reporting System Database Throughout 2007 to 2018

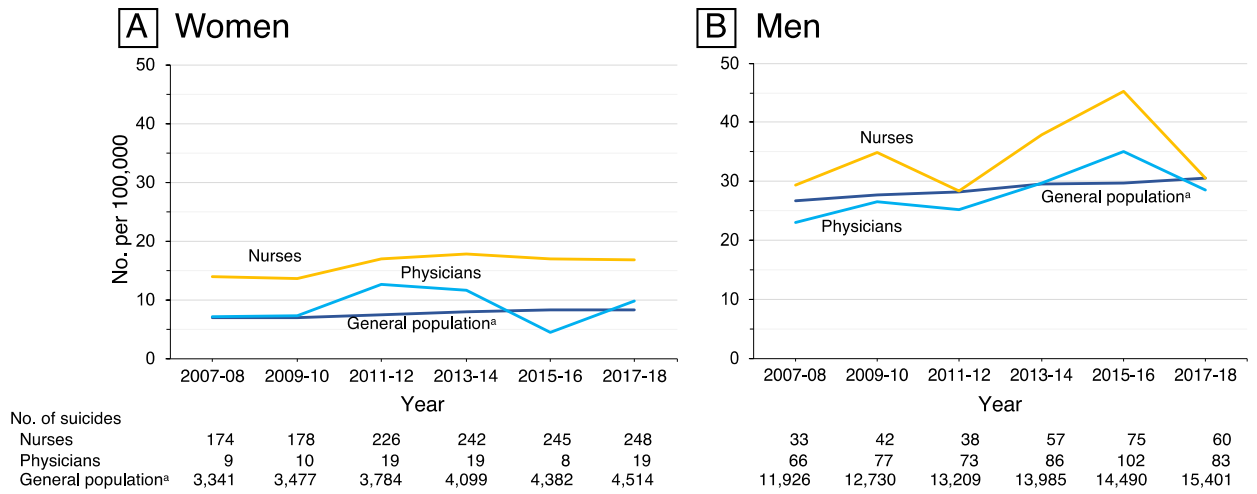

Analyses restricted to the 16 states that participated in the National Violent Death Reporting System from 2007 to 2018 (eTable 3)

a: general population refers to adults ( $\geq 30$  years) who are not nurses or physicians

**eFigure 3.** Age Distribution of US Nurses, Age Distribution of General Population, and Suicide Incidence in the General Population<sup>b</sup>

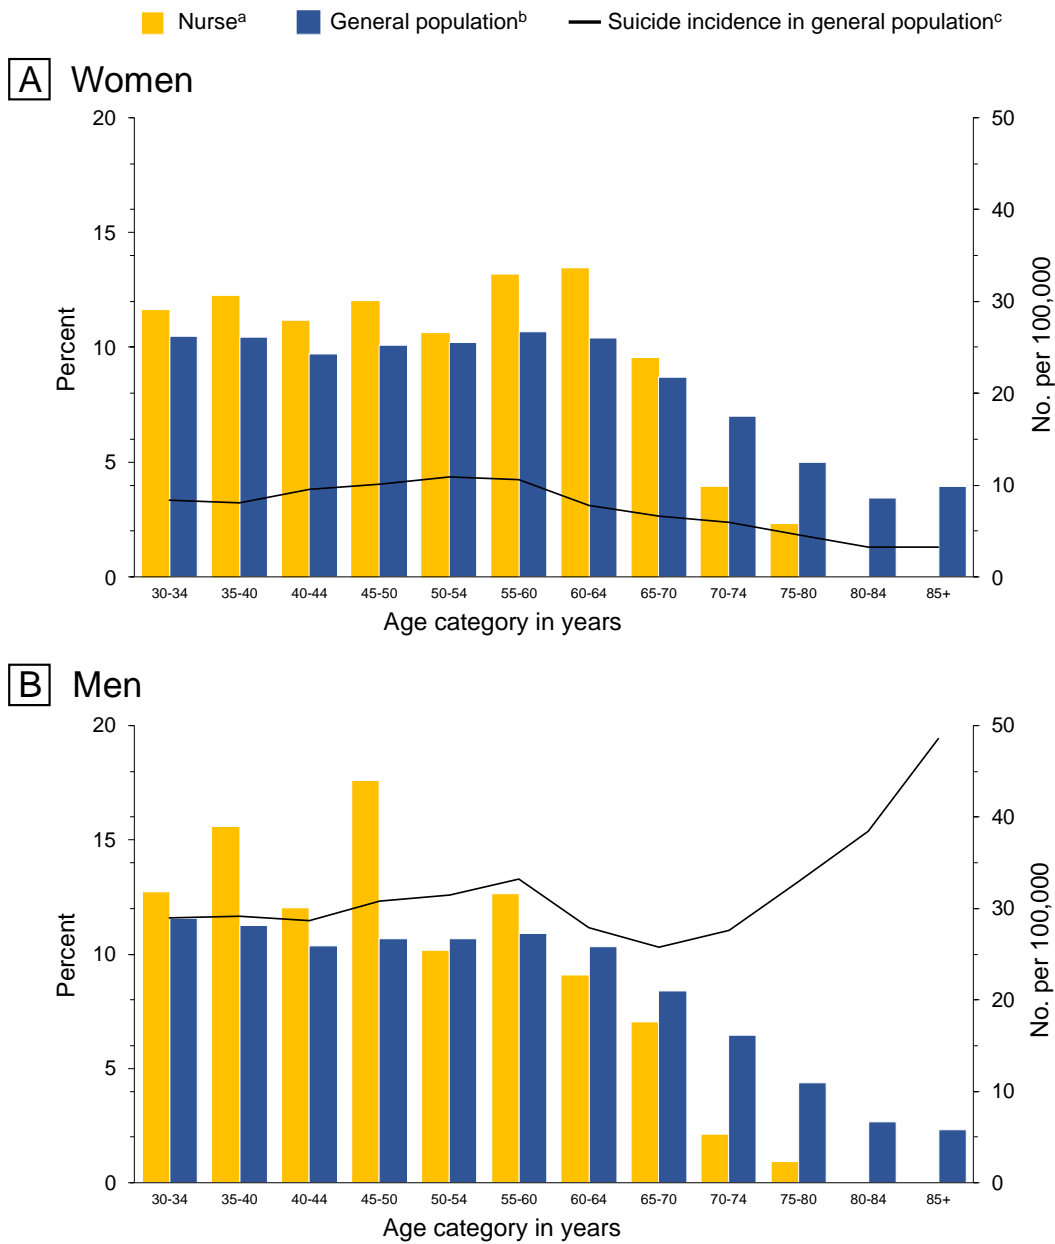

a: Age distribution of U.S. nurses estimated from the Health Resources and Services Administration’s 2018 National Sample of Registered Nurses (n = 50,273 weighted to represent U.S. registered nurse population in 2018)

b: Age distribution of U.S. adults (≥ 30 years) in 2018 obtained from U.S. Census Bureau

c: 2017-18 suicide incidence based on authors’ analyses
